# Supplementary figures and images for: Stable task information from an unstable neural population
Source: eLife journal article supplement (doi:10.7554/elife.51121), 2020-07-13

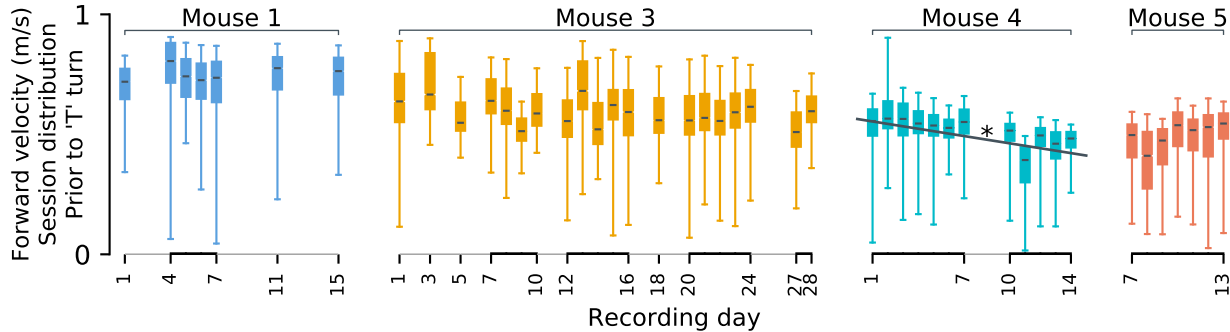

Supplement: supp [file elife_poa_e51121_Figure_2_figure_supplement_1.pdf › elife_poa_e51121_Figure_2_figure_supplement_1.pdf]

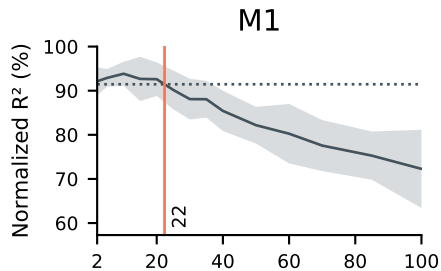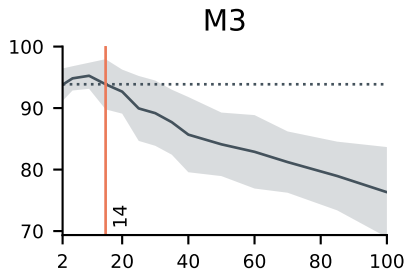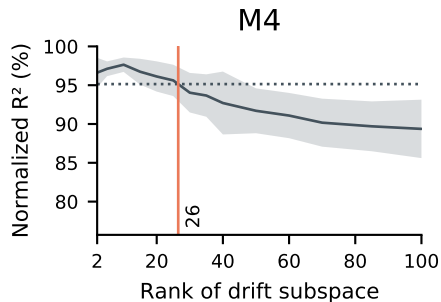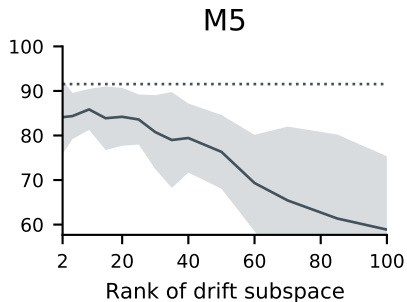

Supplement: supp [file elife_poa_e51121_Figure_4_figure_supplement_1.pdf › elife_poa_e51121_Figure_4_figure_supplement_1.pdf]

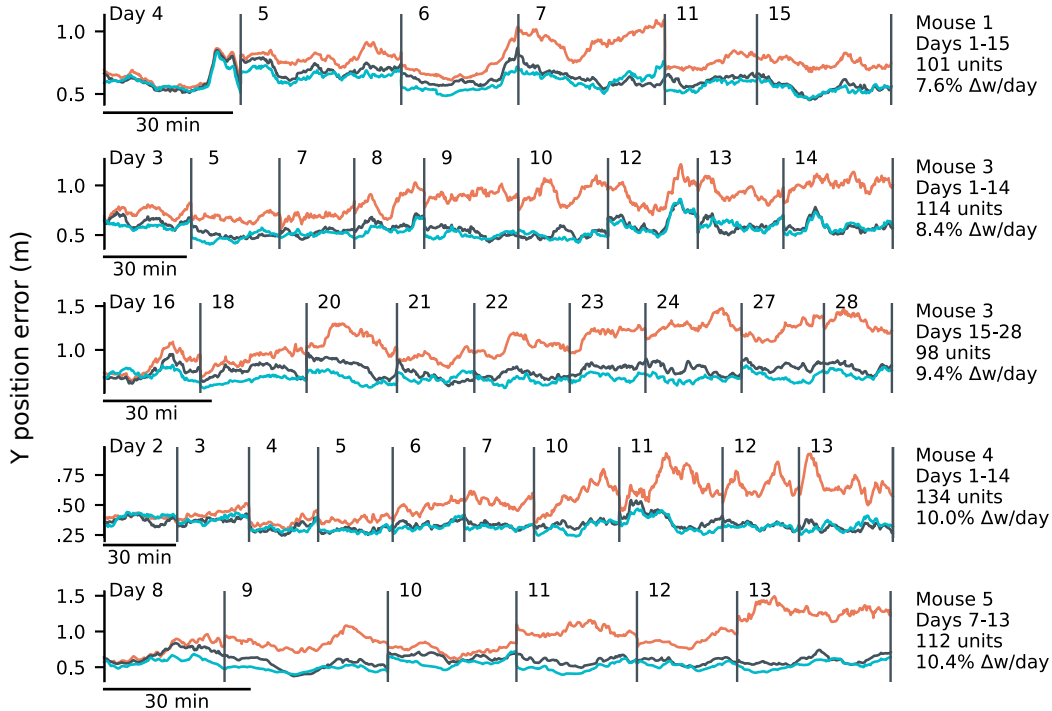

Supplement: supp [file elife_poa_e51121_Figure_5_figure_supplement_1.pdf › elife_poa_e51121_Figure_5_figure_supplement_1.pdf]

Mouse 3, 10 sessions over 13 days

Target error 0.68 m

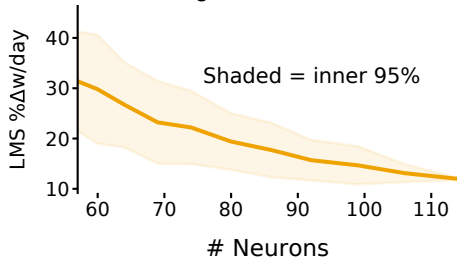

Mouse 4, 12 sessions over 13 days

Target error 0.48 m

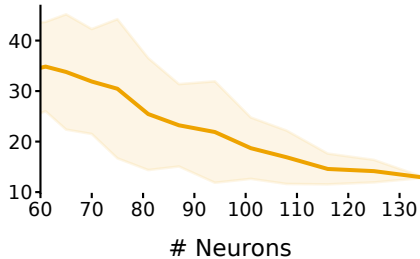

Supplement: supp [file elife_poa_e51121_Figure_5_figure_supplement_2.pdf › elife_poa_e51121_Figure_5_figure_supplement_2.pdf]

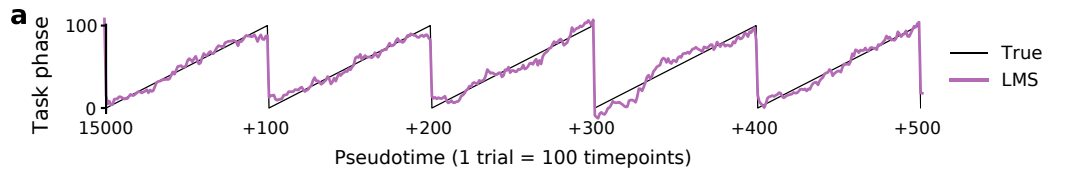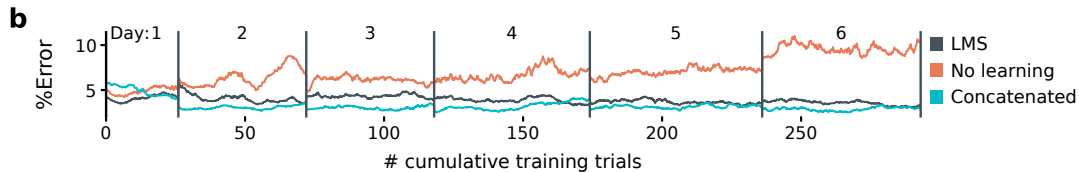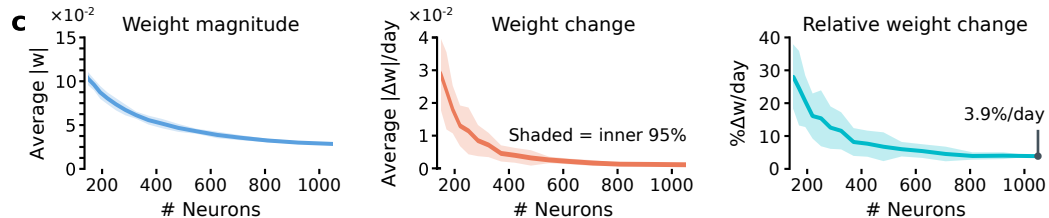

Supplement: supp [file elife_poa_e51121_Figure_5_figure_supplement_3.pdf › elife_poa_e51121_Figure_5_figure_supplement_3.pdf]
